# Supplementary material for: Exploration of Si–N compounds as high energy density materials
Source: Royal Society of Chemistry journal article supplement (doi:10.1039/d4cp02469a), 2024-01-01
Supplement: d4cp02469a1.pdf [file d4cp02469a1.pdf]

## Supplementary Information for

### Exploration of Si-N Compounds as High Energy Density Material

Paras Patel<sup>1</sup>, Saurav Patel<sup>1</sup>, Madhavi H. Dalsaniya<sup>2,3</sup>, Dominik Kurzydłowski<sup>3</sup>, Krzysztof J. Kurzydłowski<sup>2,4</sup> and Prafulla K. Jha<sup>1\*</sup>

<sup>1</sup>Department of Physics, Faculty of Science, The Maharaja Sayajirao University of Baroda, Vadodara, Gujarat, India-390002

<sup>2</sup>Faculty of Materials Science and Engineering, Warsaw University of Technology, Wołoska 141, 02-507, Warsaw, Poland

<sup>3</sup>Faculty of Mathematics and Natural Sciences, Cardinal Stefan Wyszyński University in Warsaw, 01-038 Warsaw, Poland

<sup>4</sup>Faculty of Mechanical Engineering, Białystok University of Technology, Wiejska 45C, 15-351, Białystok, Poland

\*E-mail: [prafullaj@yahoo.com](mailto:prafullaj@yahoo.com)

## 1. Figures

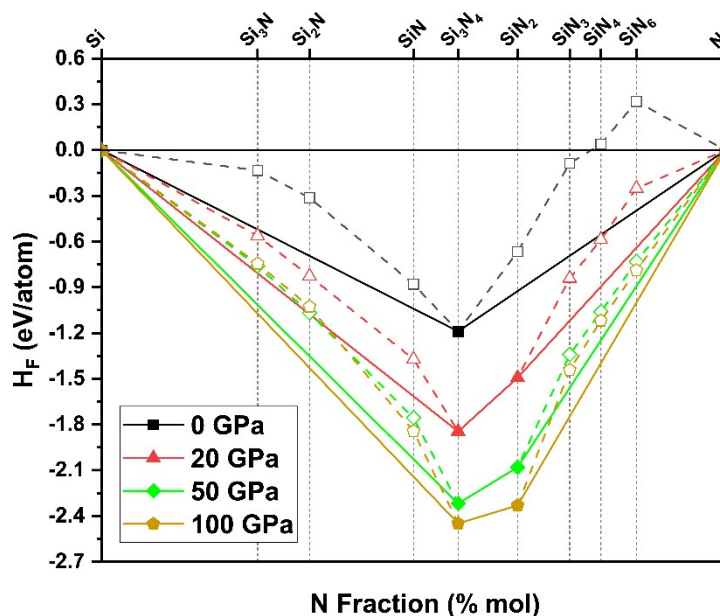

Fig. S1. Convex hull diagram for the Si-N systems at selected pressures by considering stable phases of  $N_2$ .

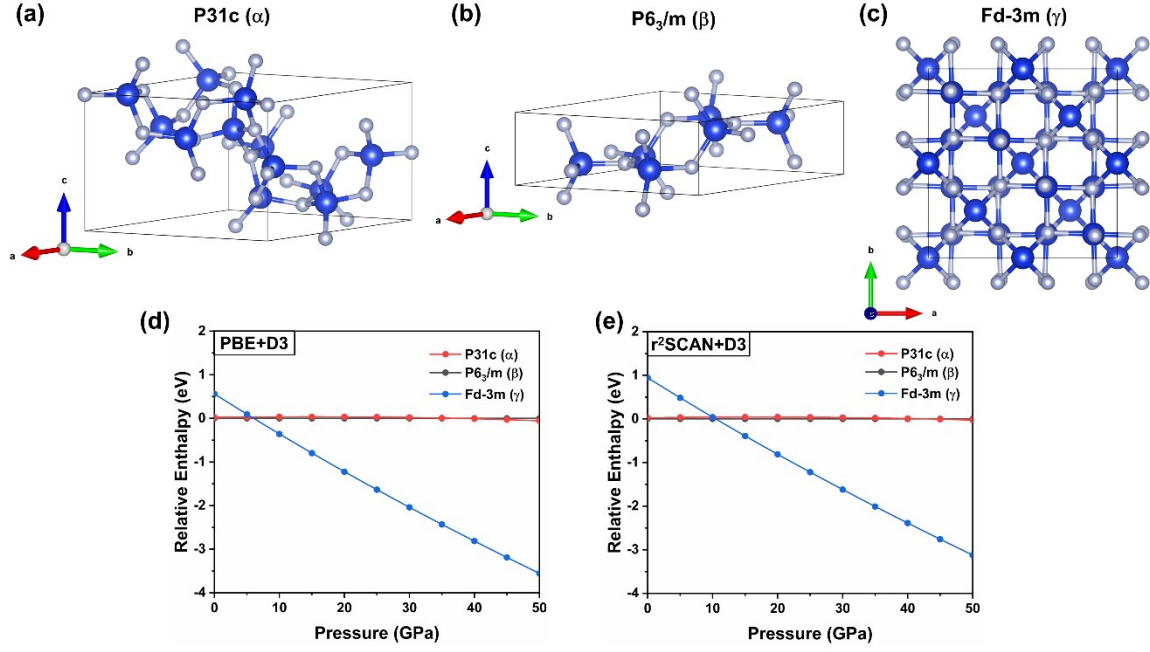

Fig. S2. Structural view of  $P31c$ - $\text{Si}_3\text{N}_4$  at 0 GPa (a),  $P6_3/m$ - $\text{Si}_3\text{N}_4$  at 0 GPa (b),  $Fd-3m$ - $\text{Si}_3\text{N}_4$  at 10 GPa (c); pressure dependent relative enthalpy curve using PBE+D3 functional (d) and  $r^2\text{SCAN}+\text{D3}$  functional (e).

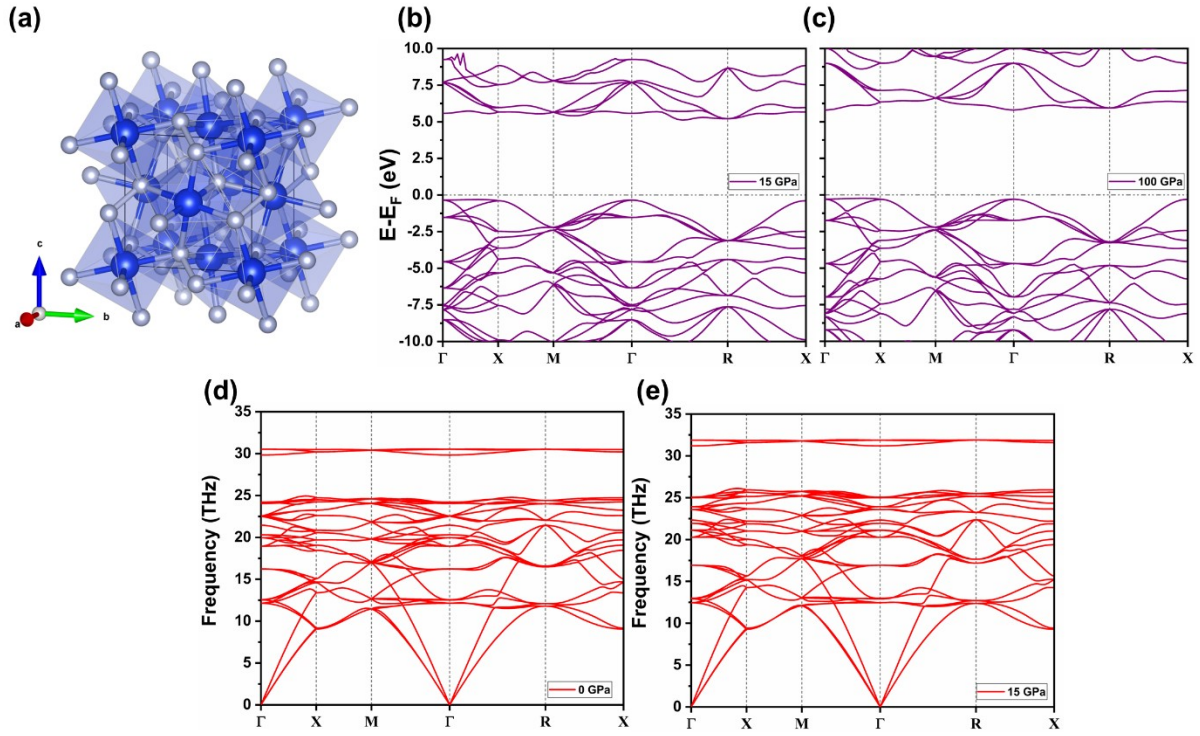

Fig. S3. Structural view at 15 GPa (a); Electronic band structure at 15 GPa (b) and 100 GPa (c); phonon dispersion curves at 0 GPa (d) and 15 GPa (e) of  $Pa-3$ - $\text{SiN}_2$ , respectively.

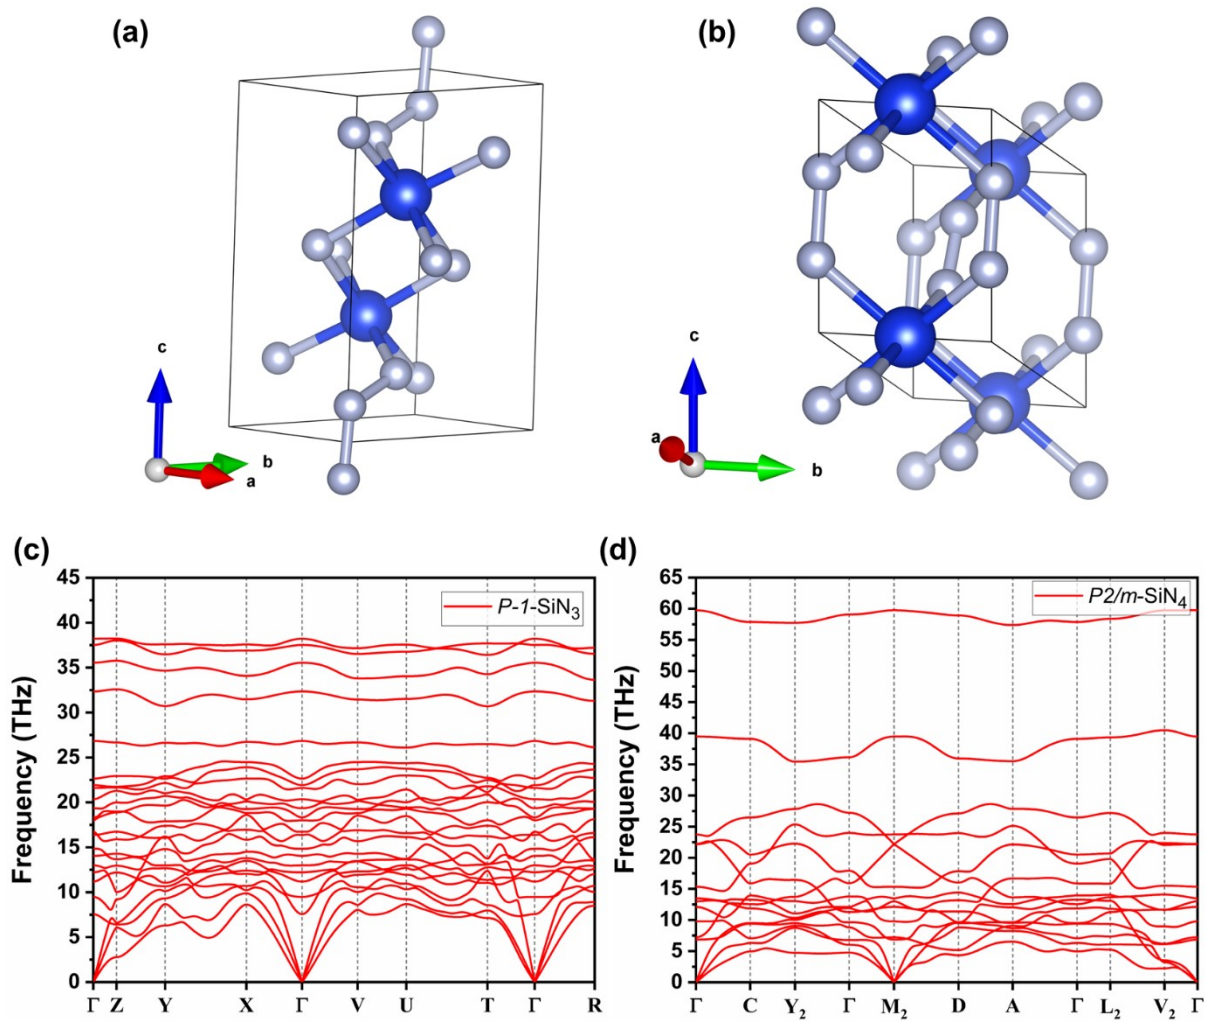

Fig. S4. Structural view (a and b); phonon dispersion curves (c and d) of  $P-1\text{-SiN}_3$  and  $P2/m\text{-SiN}_4$  at ambient pressure, respectively.

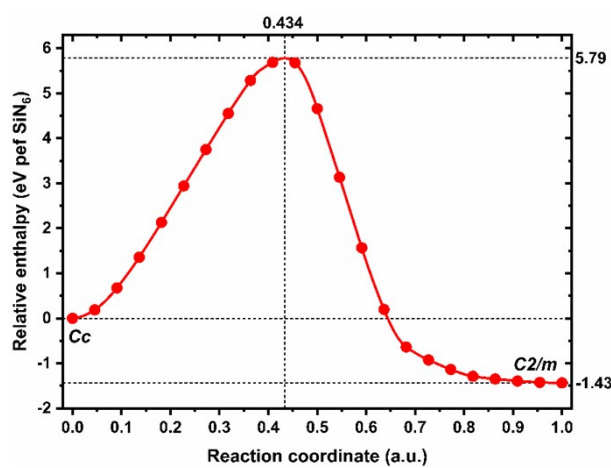

Fig. S5. The energy barrier for the  $Cc$  to  $C2/m\text{-SiN}_6$  structural phase transition at ambient pressure.

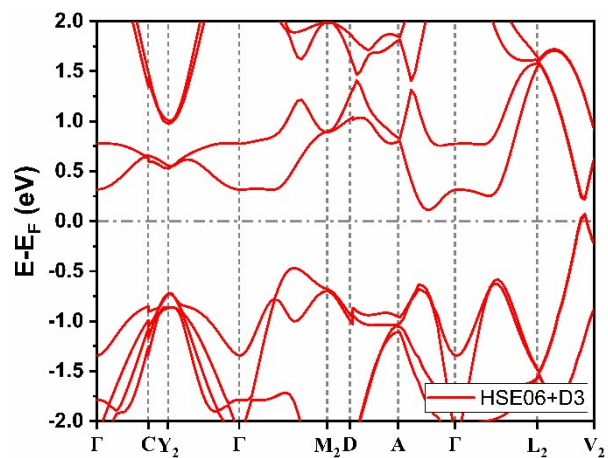

Fig. S6. Electronic band structure of  $Cc$ - $\text{SiN}_6$  at and 100 GPa using HSE06+D3.

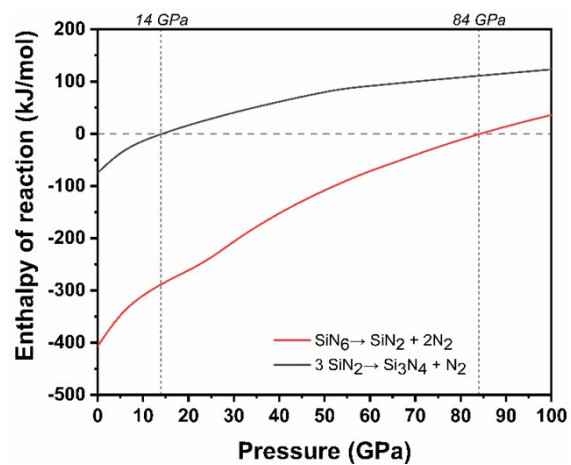

Fig. S7. Enthalpy of reaction for  $\text{SiN}_6$  and  $\text{SiN}_2$  as function of pressure.

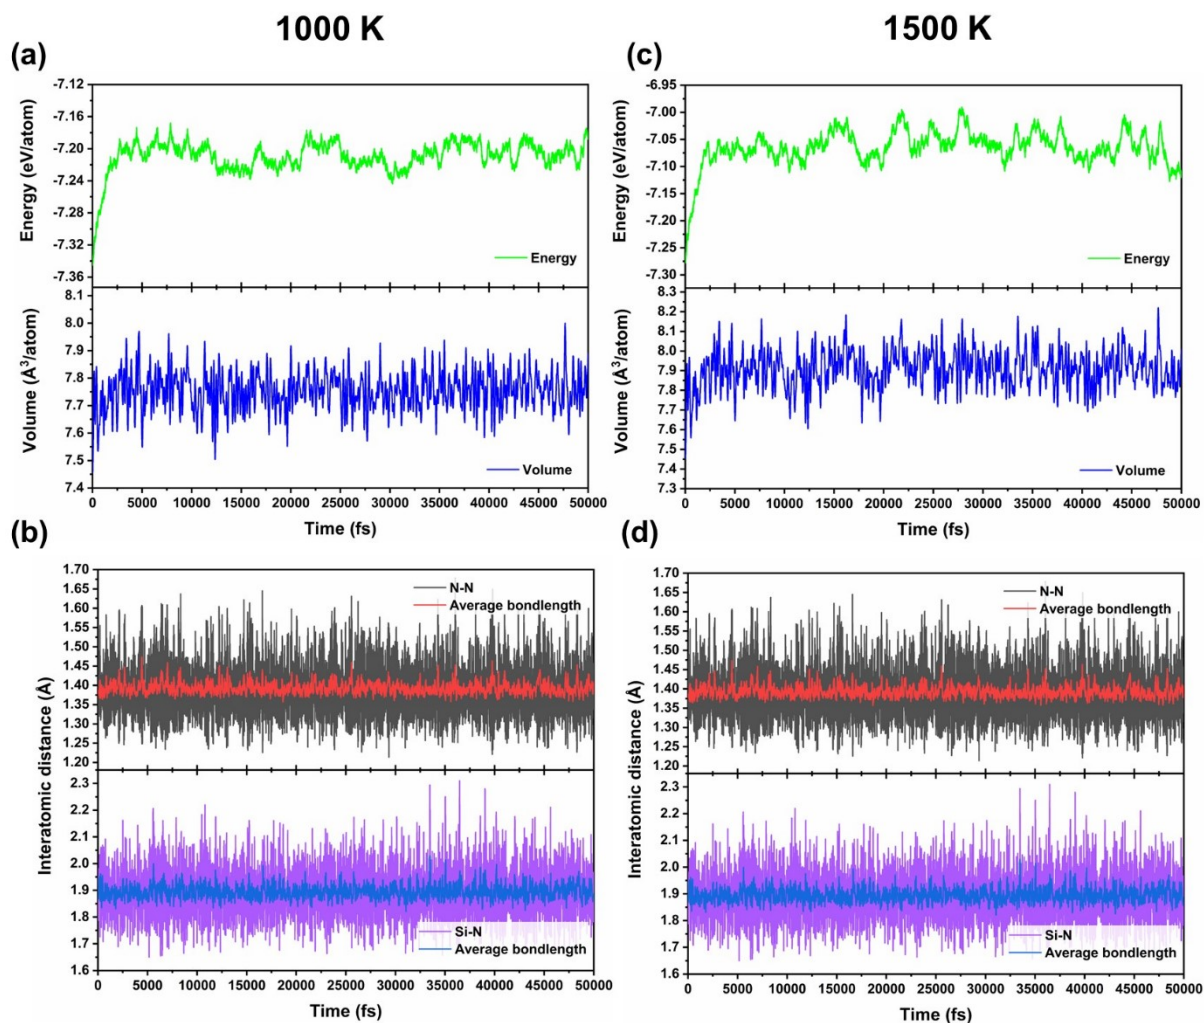

Fig. S8. Fluctuations in Energy, volume, and interatomic distances (N-N, Si-N) of  $Cc$ - $SiN_6$  with respect to MD steps for 1000 K (a, b) and 1500 K (c, d), respectively.

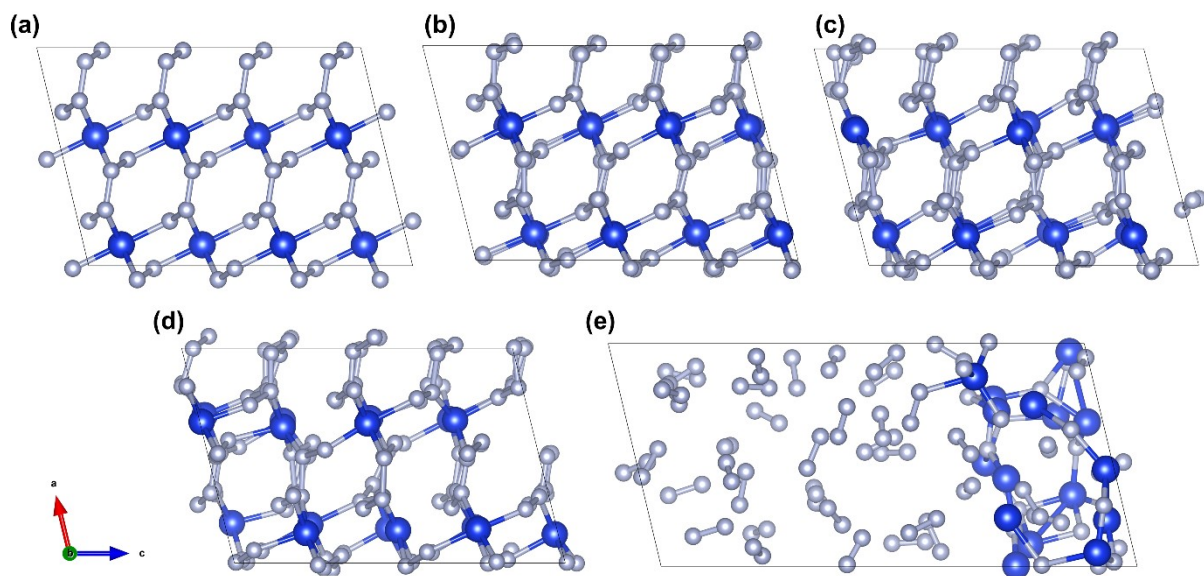

Fig. S9. Structural snapshot of  $Cc$ - $SiN_6$  after 50 ps of MD run at 0 (a), 300 (b), 1000 (c), 1500 (d) and 2000 K (e), respectively.

## 2. Tables

Table S1. Comparison of structural parameters of Si<sub>3</sub>N<sub>4</sub>.

| Phase                                                         | Pressure (GPa) | Lattice parameters                                     | Reference                 |
|---------------------------------------------------------------|----------------|--------------------------------------------------------|---------------------------|
| $\beta$ -Si <sub>3</sub> N <sub>4</sub><br>P6 <sub>3</sub> /m | 0              | $a = b = 7.595 \text{ \AA}$<br>$c = 2.902 \text{ \AA}$ | Experimental <sup>1</sup> |
|                                                               |                | $a = b = 7.615 \text{ \AA}$<br>$c = 2.909 \text{ \AA}$ | <b>This work (PBE+D3)</b> |
|                                                               |                | $a = b = 7.585 \text{ \AA}$<br>$c = 2.898 \text{ \AA}$ | This work (r2SCAN+D3)     |
|                                                               |                | $a = b = 7.657 \text{ \AA}$<br>$c = 2.925 \text{ \AA}$ | This work (PBE)           |
|                                                               |                | $a = b = 7.632 \text{ \AA}$<br>$c = 2.915 \text{ \AA}$ | Theory <sup>2</sup>       |
| $\alpha$ -Si <sub>3</sub> N <sub>4</sub><br>P31c              | 0              | $a = b = 7.754 \text{ \AA}$<br>$c = 5.621 \text{ \AA}$ | Experimental <sup>3</sup> |
|                                                               |                | $a = b = 7.760 \text{ \AA}$<br>$c = 5.627 \text{ \AA}$ | <b>This work (PBE+D3)</b> |
|                                                               |                | $a = b = 7.731 \text{ \AA}$<br>$c = 5.604 \text{ \AA}$ | This work (r2SCAN+D3)     |
|                                                               |                | $a = b = 7.807 \text{ \AA}$<br>$c = 5.658 \text{ \AA}$ | This work (PBE)           |
|                                                               |                | $a = b = 7.781 \text{ \AA}$<br>$c = 5.641 \text{ \AA}$ | Theory <sup>2</sup>       |
| $\gamma$ -Si <sub>3</sub> N <sub>4</sub><br>Fd-3m             | 0              | $a=7.736 \text{ \AA}$                                  | Experimental <sup>4</sup> |
|                                                               |                | $a=7.732 \text{ \AA}$                                  | <b>This work (PBE+D3)</b> |
|                                                               |                | $a=7.708 \text{ \AA}$                                  | This work (r2SCAN+D3)     |
|                                                               |                | $a = 7.785 \text{ \AA}$                                | This work (PBE)           |
|                                                               |                | $a=7.773 \text{ \AA}$                                  | Theory <sup>2</sup>       |

Table S2. Comparison of structural parameter of SiN<sub>2</sub>.

| Phase                         | Pressure (GPa) | Lattice parameters    | Reference                 |
|-------------------------------|----------------|-----------------------|---------------------------|
| $Pa\bar{3}$ -SiN <sub>2</sub> | 0              | $a=4.437 \text{ \AA}$ | Experimental <sup>5</sup> |
|                               |                | $a=4.439 \text{ \AA}$ | <b>This work (PBE+D3)</b> |
|                               |                | $a=4.428 \text{ \AA}$ | This work (r2SCAN+D3)     |
|                               |                | $a=4.469 \text{ \AA}$ | This work (PBE)           |

Table 3. Charge analysis and interatomic distance between Si-N and N-N at 20 GPa using r2SCAN+D3 functionals at in Si<sub>3</sub>N<sub>4</sub>, SiN<sub>2</sub> and SiN<sub>6</sub>.

| Properties   | Si <sub>3</sub> N <sub>4</sub> ( $Fd\bar{3}m$ ) | SiN <sub>2</sub> ( $Pa\bar{3}$ ) | SiN <sub>6</sub> ( $C2/m$ ) | SiN <sub>6</sub> ( $Cc$ ) |
|--------------|-------------------------------------------------|----------------------------------|-----------------------------|---------------------------|
| q(Si)        | 1.42, 1.54                                      | 1.38 (x1)                        | 1.23                        | 1.40                      |
| q(N)         | -1.09                                           | -0.69 (x2)                       | -0.21 (x6)                  | -0.22(x4), -0.25(x2)      |
| R(Si-N)      | 1.731(x4), 1.840(x6)                            | 1.855                            | 1.843(x6), 1.820(x4)        | 1.822(x6), 1.814(x4)      |
| ICOBI (Si-N) | 0.76, 0.51                                      | 0.54                             | 0.54, 0.55                  | 0.53, 0.54                |
| R(N-N)       | -                                               | 1.455                            | 1.174                       | 1.343, 1.358              |
| ICOBI (N-N)  | -                                               | 0.95                             | 1.91                        | 1.05, 1.06                |

## References:

- 1 R. Grün, The crystal structure of  $\beta$ -Si<sub>3</sub>N<sub>4</sub>: structural and stability considerations between  $\alpha$ - and  $\beta$ -Si<sub>3</sub>N<sub>4</sub>, *Acta Crystallogr. Sect. B Struct. Crystallogr. Cryst. Chem.*, 1979, **35**, 800–804.
- 2 D. Chen and B. H. Yu, Pressure-induced phase transition in silicon nitride material, *Chinese Phys. B.*, DOI:10.1088/1674-1056/22/2/023104.
- 3 J. Y. Zhang, Y. X. Chen, T. L. Guo, Z. X. Lin and T. H. Wang, Sub-band-gap photoconductivity of individual  $\alpha$ -Si<sub>3</sub>N<sub>4</sub> nanowires, *Nanotechnology*, DOI:10.1088/0957-4484/18/32/325603.
- 4 H. Hintzen, M. R. M. Hendrix, H. Wondergem, C. Fang, T. Sekine and G. de With, Thermal expansion of cubic Si<sub>3</sub>N<sub>4</sub> with the spinel structure, *J. Alloys Compd.*, 2003, **351**, 40–42.
- 5 K. Niwa, H. Ogasawara and M. Hasegawa, Pyrite form of group-14 element pernitrides synthesized at high pressure and high temperature, *Dalt. Trans.*, 2017, **46**, 9750–9754.
